# Supplementary material for: Functional differences in cerebral activation between slow wave-coupled and uncoupled sleep spindles
Source: Frontiers journal article supplement (doi:10.3389/fnins.2022.1090045), 2023-01-18
Supplement: Image_1.PDF [file Image_1.PDF]

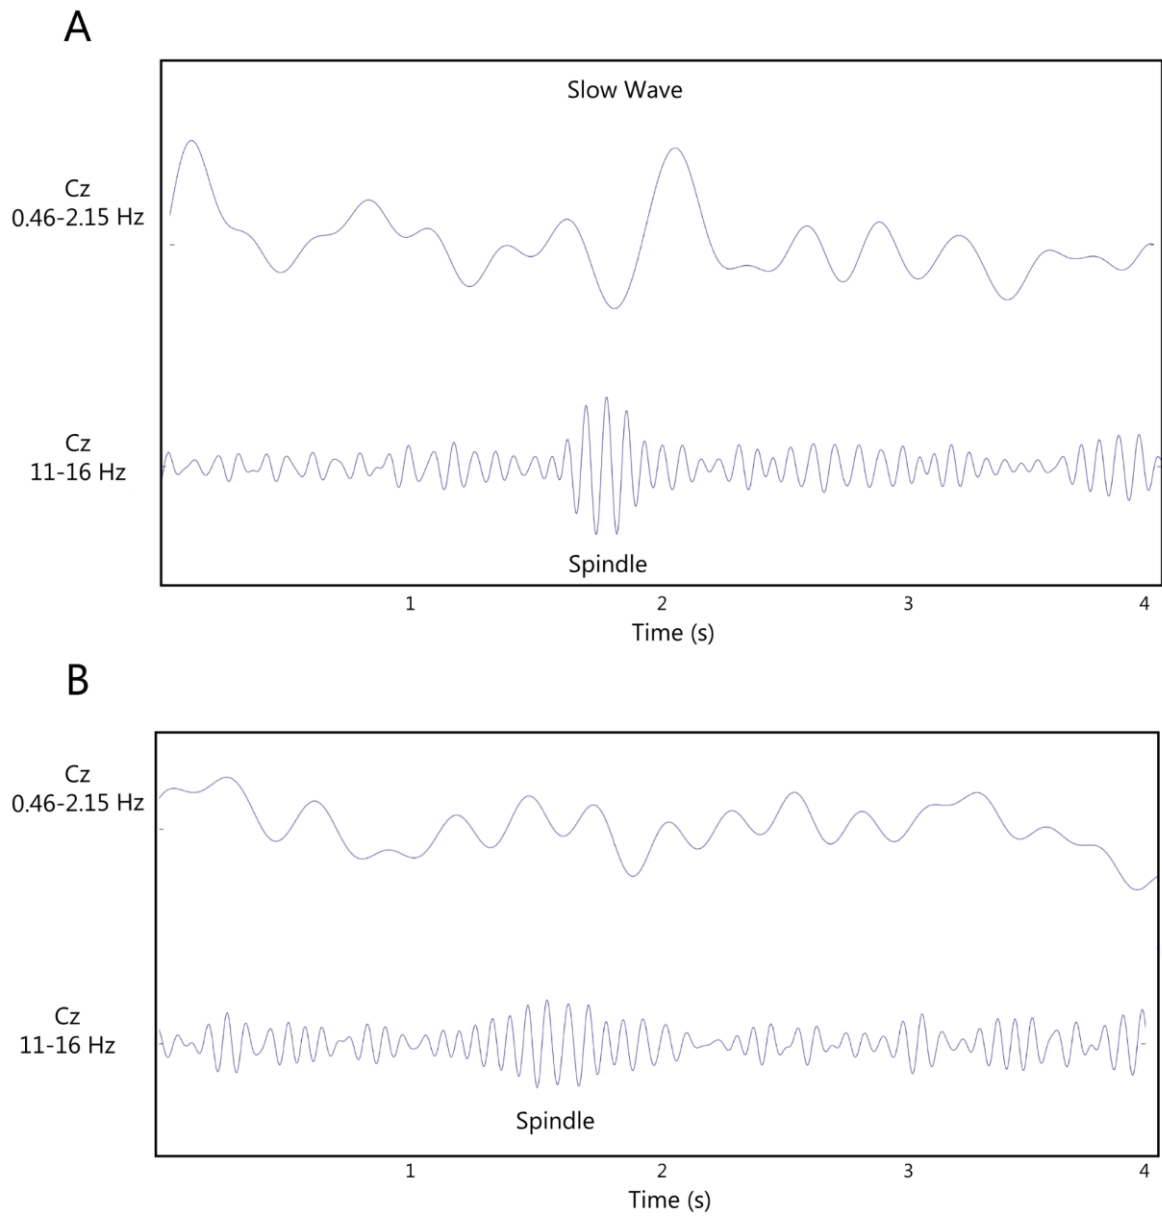

**Figure S1.** EEG trace example for (A) coupled SW-spindle and (B) uncoupled spindle events.
